# Supplementary material for: A parallel and distributed stochastic gradient descent implementation using commodity clusters
Source: Springer Nature journal article supplement (doi:10.1186/s40537-019-0179-2), 2019-02-14
Supplement: MOESM1 [file 16482862]

**Additional Figures and Tables**

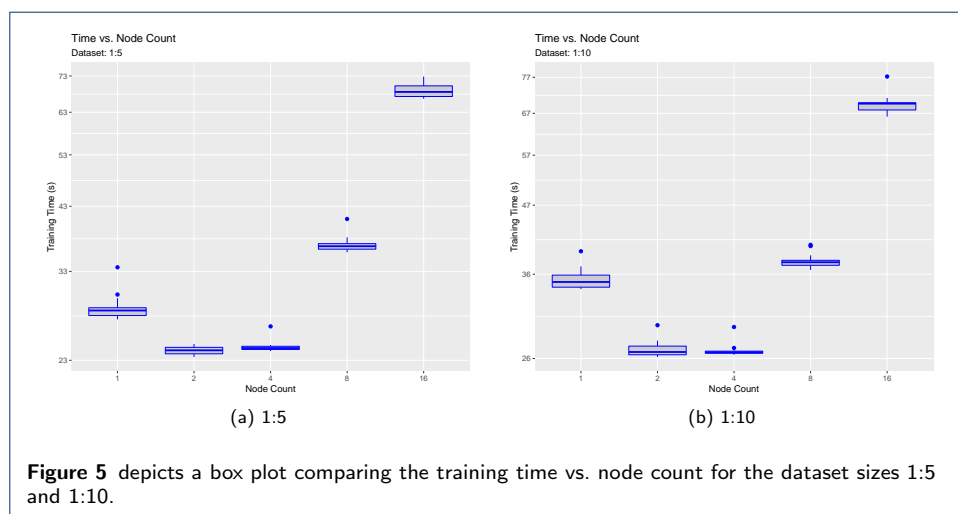

**Figure 5** depicts a box plot comparing the training time vs. node count for the dataset sizes 1:5 and 1:10.

|           | Df | Sum Sq   | Mean Sq | F value | Pr(>F) |
|-----------|----|----------|---------|---------|--------|
| Nodes     | 4  | 28247.64 | 7061.91 | 4840.01 | 0.0000 |
| Residuals | 95 | 138.61   | 1.46    |         |        |

**Table 3** Training Time - Number of Nodes 1:5 ANOVA

|    | TrainingTime | groups |
|----|--------------|--------|
| 16 | 68.75        | a      |
| 8  | 36.77        | b      |
| 1  | 28.46        | c      |
| 4  | 24.28        | d      |
| 2  | 23.92        | d      |

**Table 4** Tukey HSD test with groupings. Training time vs. # nodes, 1:5

|           | Df | Sum Sq   | Mean Sq | F value | Pr(>F) |
|-----------|----|----------|---------|---------|--------|
| Nodes     | 4  | 24510.20 | 6127.55 | 3322.10 | 0.0000 |
| Residuals | 95 | 175.23   | 1.84    |         |        |

**Table 5** Training Time - Number of Nodes 1:10 ANOVA

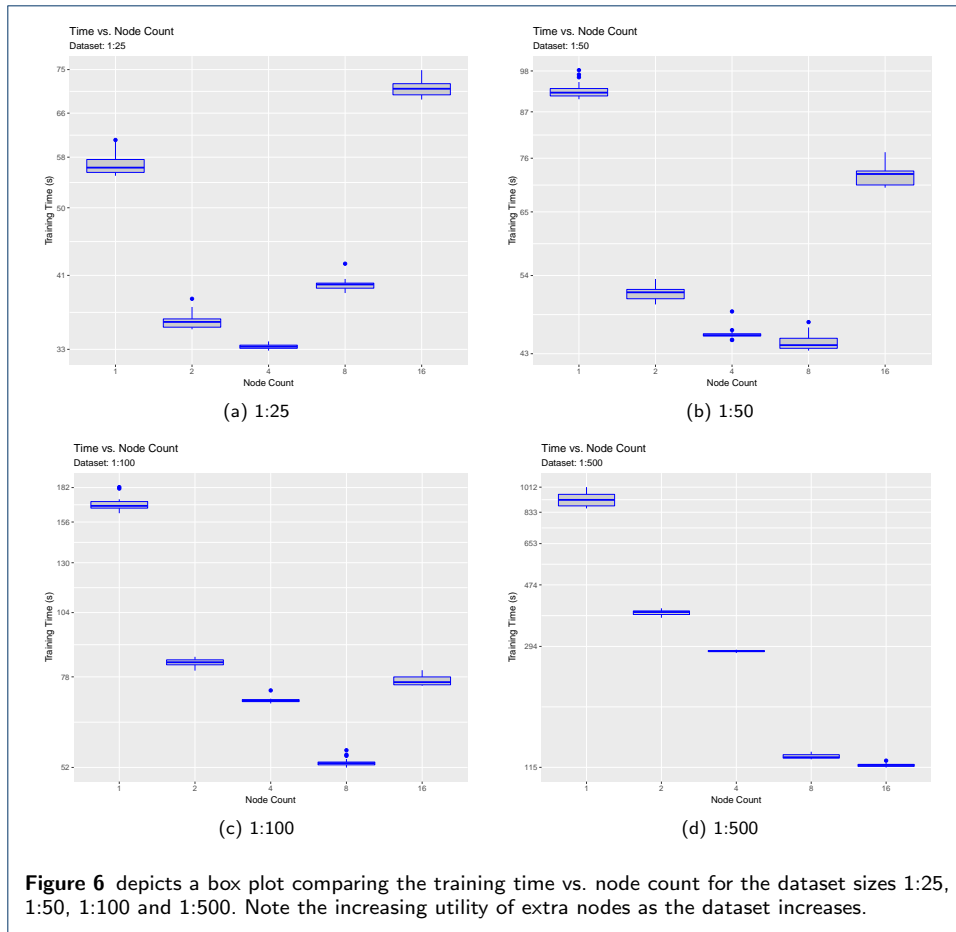

**Figure 6** depicts a box plot comparing the training time vs. node count for the dataset sizes 1:25, 1:50, 1:100 and 1:500. Note the increasing utility of extra nodes as the dataset increases.

|    | TrainingTime | groups |
|----|--------------|--------|
| 16 | 69.25        | a      |
| 8  | 37.84        | b      |
| 1  | 35.27        | c      |
| 2  | 26.93        | d      |
| 4  | 26.76        | d      |

**Table 6** Tukey HSD test with groupings. Training time vs. # nodes, 1:10

|           | Df | Sum Sq   | Mean Sq | F value | Pr(>F) |
|-----------|----|----------|---------|---------|--------|
| Nodes     | 4  | 20631.91 | 5157.98 | 3681.09 | 0.0000 |
| Residuals | 95 | 133.12   | 1.40    |         |        |

**Table 7** Training Time - Number of Nodes 1:10 ANOVA

|    | TrainingTime | groups |
|----|--------------|--------|
| 16 | 70.98        | a      |
| 1  | 56.81        | b      |
| 8  | 39.94        | c      |
| 2  | 35.91        | d      |
| 4  | 33.28        | e      |

**Table 8** Tukey HSD test with groupings. Training time vs. # nodes, 1:25

|           | Df | Sum Sq   | Mean Sq | F value | Pr(>F) |
|-----------|----|----------|---------|---------|--------|
| Nodes     | 4  | 34671.41 | 8667.85 | 3891.79 | 0.0000 |
| Residuals | 95 | 211.59   | 2.23    |         |        |

**Table 9** Training Time - Number of Nodes 1:10 ANOVA

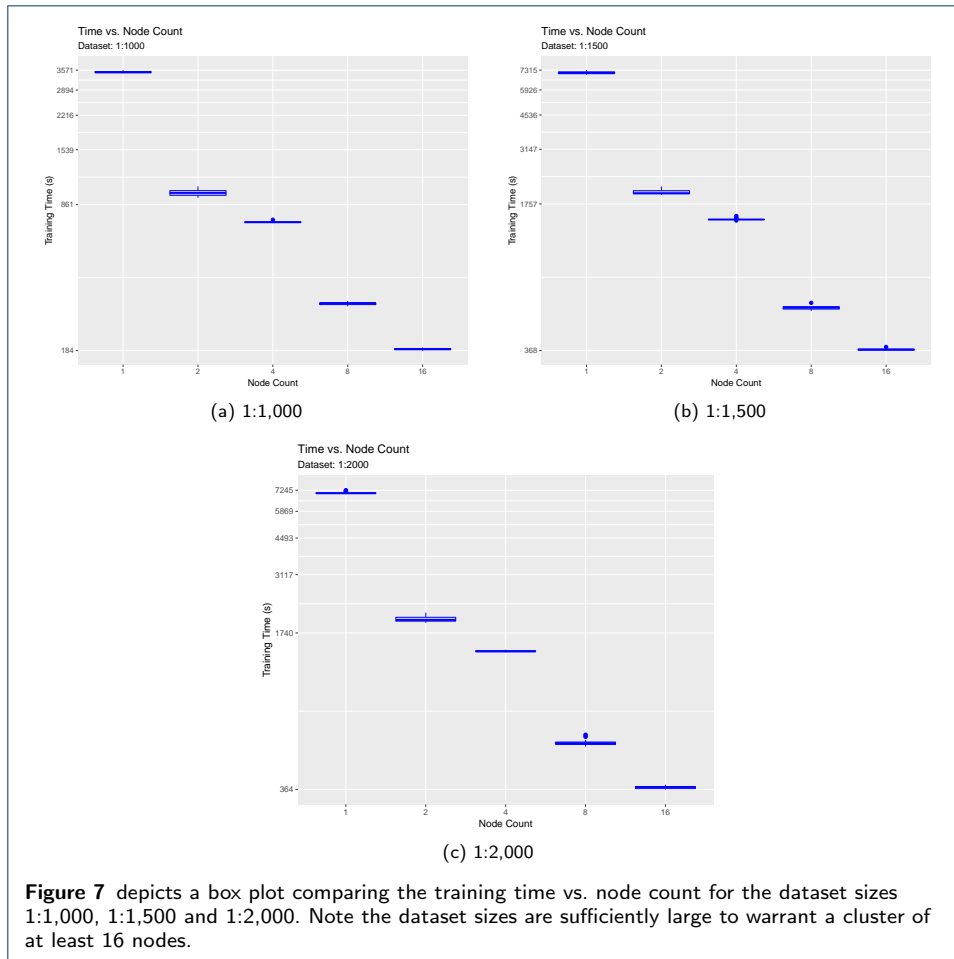

|    | TrainingTime | groups |
|----|--------------|--------|
| 1  | 92.66        | a      |
| 16 | 72.18        | b      |
| 2  | 51.25        | c      |
| 4  | 45.57        | d      |
| 8  | 44.47        | d      |

**Table 10** Tukey HSD test with groupings. Training time vs. # nodes, 1:50

|           | Df | Sum Sq    | Mean Sq  | F value | Pr(>F) |
|-----------|----|-----------|----------|---------|--------|
| Nodes     | 4  | 163360.77 | 40840.19 | 5822.21 | 0.0000 |
| Residuals | 95 | 666.38    | 7.01     |         |        |

**Table 11** Training Time - Number of Nodes 1:10 ANOVA

|    | TrainingTime | groups |
|----|--------------|--------|
| 1  | 168.72       | a      |
| 2  | 83.02        | b      |
| 16 | 76.60        | c      |
| 4  | 70.23        | d      |
| 8  | 53.23        | e      |

**Table 12** Tukey HSD test with groupings. Training time vs. # nodes, 1:100

|           | Df | Sum Sq     | Mean Sq    | F value | Pr(>F) |
|-----------|----|------------|------------|---------|--------|
| Nodes     | 4  | 8775639.96 | 2193909.99 | 3561.74 | 0.0000 |
| Residuals | 95 | 58516.80   | 615.97     |         |        |

**Table 13** Training Time - Number of Nodes 1:10 ANOVA

|    | TrainingTime | groups |
|----|--------------|--------|
| 1  | 924.28       | a      |
| 2  | 381.50       | b      |
| 4  | 283.44       | c      |
| 8  | 125.12       | d      |
| 16 | 116.94       | d      |

**Table 14** Tukey HSD test with groupings. Training time vs. # nodes, 1:500

|           | Df | Sum Sq       | Mean Sq     | F value  | Pr(>F) |
|-----------|----|--------------|-------------|----------|--------|
| Nodes     | 4  | 147538415.96 | 36884603.99 | 81140.16 | 0.0000 |
| Residuals | 95 | 43185.00     | 454.58      |          |        |

**Table 15** Training Time - Number of Nodes 1:10 ANOVA

|    | TrainingTime | groups |
|----|--------------|--------|
| 1  | 3498.11      | a      |
| 2  | 976.49       | b      |
| 4  | 715.89       | c      |
| 8  | 302.60       | d      |
| 16 | 186.87       | e      |

**Table 16** Tukey HSD test with groupings. Training time vs. # nodes, 1:1000

|           | Df | Sum Sq       | Mean Sq      | F value  | Pr(>F) |
|-----------|----|--------------|--------------|----------|--------|
| Nodes     | 4  | 595817698.86 | 148954424.72 | 56721.27 | 0.0000 |
| Residuals | 90 | 236346.94    | 2626.08      |          |        |

**Table 17** Training Time - Number of Nodes 1:10 ANOVA

|    | TrainingTime | groups |
|----|--------------|--------|
| 1  | 7113.30      | a      |
| 2  | 1997.29      | b      |
| 4  | 1492.72      | c      |
| 8  | 581.39       | d      |
| 16 | 372.73       | e      |

**Table 18** Tukey HSD test with groupings. Training time vs. # nodes, 1:1500

|           | Df | Sum Sq       | Mean Sq      | F value  | Pr(>F) |
|-----------|----|--------------|--------------|----------|--------|
| Nodes     | 4  | 592359783.04 | 148089945.76 | 82896.55 | 0.0000 |
| Residuals | 92 | 164352.73    | 1786.44      |          |        |

**Table 19** Training Time - Number of Nodes 1:10 ANOVA

|    | TrainingTime | groups |
|----|--------------|--------|
| 1  | 7052.96      | a      |
| 2  | 2000.89      | b      |
| 4  | 1450.84      | c      |
| 8  | 581.50       | d      |
| 16 | 372.25       | e      |

**Table 20** Tukey HSD test with groupings. Training time vs. # nodes, 1:2000
